# Supplementary material
Source: publisher figshare collection journal article supplement (https://sage.figshare.com/ndownloader/files/36009491)
Supplement: Supplementary file 1 [file 36009491]

| Interval: Pretreatment | | Males | | Females | |
| --- | --- | --- | --- | --- | --- |
| Measurement | Origin | Cambodian | Chinese | Cambodian | Chinese |
| Aspartate Aminotransferase Activity (U/L)b | Chinese | 2.85 | - | 5.56 [<0.0001] | - |
| Vietnamese | -0.168 | -3.02 | 1.7 | -3.86 |
| Alanine Aminotransferase Activity (U/L) | Chinese | 3.11 | - | 0.42 | - |
| Vietnamese | 0.508 | -2.61 | -7.26 | -7.68 |
| Alkaline Phosphatase Activity (U/L)a,b | Chinese | -60.7 [<0.0001] | - | -2.07 | - |
| Vietnamese | -119 [<0.0001] | -58.8 [<0.0001] | -84.9 [<0.0001] | -82.8 [<0.0001] |
| Gamma-Glutamyltransferase Activity (U/L)a | Chinese | -6.16 [<0.0001] | - | -0.126 | - |
| Vietnamese | -9.24 [<0.0001] | -3.09 | -4.39 | -4.27 |
| Creatine Kinase Activity (U/L) | Chinese | -145 | - | 330 | - |
| Vietnamese | -454 | -308 | -252 | -582 |
| Total Bilirubin Concentration (mg/dL) | Chinese | 0.001 | - | -0.006 | - |
| Vietnamese | -0.013 | -0.014 | -0.009 | -0.002 |
| Urea Nitrogen Concentration (mg/dL) | Chinese | -0.374 | - | 0.069 | - |
| Vietnamese | -0.729 | -0.356 | -0.701 | -0.769 |
| Creatinine Concentration (mg/dL)b | Chinese | -0.002 | - | -0.034 [<0.0001] | - |
| Vietnamese | -0.003 | -0.001 | -0.039 [<0.0001] | -0.006 |
| Sodium Concentration (mEq/L)a,b | Chinese | -0.754 [<0.0001] | - | -0.895 [<0.0001] | - |
| Vietnamese | -0.935 [0.0090] | -0.182 | -1.92 [<0.0001] | -1.02 [<0.0001] |
| Potassium Concentration (mEq/L) | Chinese | 0.053 | - | -0.045 | - |
| Vietnamese | 0.144 | 0.092 | -0.013 | 0.032 |
| Chloride Concentration (mEq/L)b | Chinese | 0.029 | - | -0.434 [0.0450] | - |
| Vietnamese | -0.248 | -0.276 | -0.791 [0.0120] | -0.357 |
| Calcium Concentration (mg/dL)a,b | Chinese | -0.135 [<0.0001] | - | -0.154 [<0.0001] | - |
| Vietnamese | 0.024 | 0.159 [0.0000] | -0.15 [0.0030] | 0.004 |
| Phosphorous Concentration (mg/dL)a,b | Chinese | -0.425 [<0.0001] | - | -0.275 [<0.0001] | - |
| Vietnamese | -0.687 [<0.0001] | -0.262 [0.0220] | -0.259 [0.0330] | 0.016 |
| Total Protein Concentration (g/dL)a,b | Chinese | 0.048 | - | 0.005 | - |
| Vietnamese | 0.145 [<0.0001] | 0.097 [0.0270] | 0.114 [0.0300] | 0.109 [0.0300] |
| Albumin Concentration (g/dL) | Chinese | -0.011 | - | -0.046 | - |
| Vietnamese | 0.066 | 0.077 | -0.035 | 0.01 |
| Globulin Concentration (g/dL)a | Chinese | -0.001 | - | 0.019 | - |
| Vietnamese | -0.002 | 0 | 0.1 | 0.081 |
| Albumin/Globulin (ratio) | Chinese | 0.014 | - | -0.034 | - |
| Vietnamese | 0.041 | 0.027 | -0.056 | -0.022 |
| Cholesterol Concentration (mg/dL) | Chinese | -2.01 | - | -2.73 | - |
| Vietnamese | -2.92 | -0.915 | -5.14 | -2.41 |
| Triglyceride Concentration (mg/dL)a | Chinese | -0.125 | - | 1.92 | - |
| Vietnamese | 0.002 | 0.127 | 1.59 | -0.331 |

| Interval: Final | | Males | | Females | |
| --- | --- | --- | --- | --- | --- |
| Measurement | Origin | Cambodian | Chinese | Cambodian | Chinese |
| Aspartate Aminotransferase Activity (U/L)a | Chinese | -4.74 | - | -0.063 | - |
| Vietnamese | -1.4 | 3.34 | -1.45 | -1.39 |
| Alanine Aminotransferase Activity (U/L)b | Chinese | -3.1 | - | -4.22 [0.0120] | - |
| Vietnamese | -0.106 | 3 | -6.45 [0.0120] | -2.23 |
| Alkaline Phosphatase Activity (U/L)a,b | Chinese | -52 [<0.0001] | - | -0.293 | - |
| Vietnamese | -65 [0.0030] | -13 | -69.1 [<0.0001] | -68.9 [<0.0001] |
| Gamma-Glutamyltransferase Activity (U/L) | Chinese | -3.82 | - | 0.689 | - |
| Vietnamese | -5.96 | -2.14 | -3.24 | -3.93 |
| Creatine Kinase Activity (U/L) | Chinese | -326 | - | 173 | - |
| Vietnamese | -125 | 200 | -28.9 | -202 |
| Total Bilirubin Concentration (mg/dL) | Chinese | -0.009 | - | -0.012 | - |
| Vietnamese | -0.011 | -0.002 | -0.016 | -0.004 |
| Urea Nitrogen Concentration (mg/dL)a,b | Chinese | 0.201 | - | 0.663 [0.0360] | - |
| Vietnamese | -1.33 [0.0060] | -1.53 [<0.0001] | -0.741 | -1.4 [0.0060] |
| Creatinine Concentration (mg/dL) | Chinese | -0.001 | - | -0.017 | - |
| Vietnamese | -0.016 | -0.015 | -0.018 | -0.002 |
| Sodium Concentration (mEq/L)a,b | Chinese | -0.56 [<0.0001] | - | -0.424 [0.0330] | - |
| Vietnamese | -1.03 [0.0030] | -0.466 | -0.907 [<0.0001] | -0.483 |
| Potassium Concentration (mEq/L) | Chinese | 0.005 | - | 0.075 | - |
| Vietnamese | 0.067 | 0.063 | 0.018 | -0.058 |
| Chloride Concentration (mEq/L) | Chinese | -0.179 | - | -0.04 | - |
| Vietnamese | -0.059 | 0.12 | -0.274 | -0.233 |
| Calcium Concentration (mg/dL)a | Chinese | -0.089 [0.0090] | - | -0.023 | - |
| Vietnamese | -0.13 [0.0090] | -0.041 | -0.087 | -0.064 |
| Phosphorous Concentration (mg/dL) | Chinese | -0.083 | - | -0.089 | - |
| Vietnamese | -0.042 | 0.041 | -0.225 | -0.136 |
| Total Protein Concentration (g/dL)a | Chinese | 0.088 [0.0120] | - | 0.031 | - |
| Vietnamese | -0.001 | -0.089 [0.0390] | 0.005 | -0.026 |
| Albumin Concentration (g/dL) | Chinese | 0.01 | - | -0.021 | - |
| Vietnamese | -0.005 | -0.015 | -0.038 | -0.017 |
| Globulin Concentration (g/dL) | Chinese | 0.051 | - | 0.034 | - |
| Vietnamese | -0.035 | -0.086 | -0.004 | -0.038 |
| Albumin/Globulin (ratio) | Chinese | -0.018 | - | -0.045 | - |
| Vietnamese | 0.025 | 0.042 | -0.029 | 0.016 |
| Cholesterol Concentration (mg/dL) | Chinese | 2.14 | - | 1.04 | - |
| Vietnamese | 0.418 | -1.72 | 0.279 | -0.762 |
| Triglyceride Concentration (mg/dL)b | Chinese | -0.887 | - | 4.26 [<0.0001] | - |
| Vietnamese | -2.62 | -1.73 | 2.93 | -1.33 |
